# Supplementary material
Source: Elsevier journal article supplement (https://www.sciencedirect.com/science/article/pii/S0210570520300704)
Supplement: mmc1 [file S0210570520300704:mmc1.doc]

**Table S1 The top 100 cited papers in hepatic disease.**

| Rank, Authors | Year | Country | Title | No. of Citation |
| --- | --- | --- | --- | --- |
| 1. Choo QL; Kuo G | 1989 | United States | Isolation of a cDNA clone derived from a blood-borne non-A, non-B viral hepatitis genome. | 5515 |
| 1. Llovet JM; Ricci S | 2008 | Spain | Sorafenib in advanced hepatocellular carcinoma. | 4895 |
| 1. Manns MP; McHutchison JG | 2001 | Germany | Peginterferon alfa-2b plus ribavirin compared with interferon alfa-2b plus ribavirin for initial treatment of chronic hepatitis C: a randomised trial. | 4800 |
| 1. Fried MW; Shiffman ML | 2002 | United States | Peginterferon alfa-2a plus ribavirin for chronic hepatitis C virus infection. | 4797 |
| 1. Mazzaferro V; Regalia E | 1996 | Italy | Liver transplantation for the treatment of small hepatocellular carcinomas in patients with cirrhosis. | 3796 |
| 6. Bruix J; Sherman M | 2005 | Spain | Management of hepatocellular carcinoma. | 3713 |
| 7. Bruix J; ShermanM | 2011 | Spain | Management of Hepatocellular Carcinoma: An Update. | 3430 |
| 1. Kleiner DE; Brunt EM | 2005 | United States | Design and validation of a histological scoring system for nonalcoholic fatty liver disease. | 3296 |
| 1. Knodell RG; Ishak KG | 1981 | United States | Formulation and application of a numerical scoring system for assessing histological activity in asymptomatic chronic active hepatitis. | 3074 |
| 10. Ishak K; Baptista A | 1995 | Switzerland | Histological grading and staging of chronic hepatitis. | 3035 |
| 11. Kuo G; Choo Q | 1989 | United States | An assay for circulating antibodies to a major etiologic virus of human non-A, non-B hepatitis. | 2997 |
| 12. Llovet JM; Burroughs A | 2003 | Spain | Hepatocellular carcinoma. | 2937 |
| 13. Bruix J; Sherman M | 2001 | Spain | Clinical management of hepatocellular carcinoma. Conclusions of the Barcelona-2000 EASL conference. European Association for the Study of the Liver. | 2910 |
| 14. El-Serag HB; Rudolph KL | 2007 | United States | Hepatocellular carcinoma: epidemiology and molecular carcinogenesis. | 2843 |
| 15. McHutchison JG; Gordon SC | 1998 | United States | Interferon alfa-2b alone or in combination with ribavirin as initial treatment for chronic hepatitis C. Hepatitis Interventional Therapy Group. | 2750 |
| 16. Angulo P | 2002 | United States | Medical progress - Nonalcoholic fatty liver disease. | 2747 |
| 17. Bataller R; Brenner David A | 2005 | United States | Liver fibrosis. | 2482 |
| 18. Ge DL; Fellay J | 2009 | United States | Genetic variation in IL28B predicts hepatitis C treatment-induced viral clearance. | 2450 |
| 19.Kamath PS; Wiesner RH | 2001 | United States | A model to predict survival in patients with end-stage liver disease. | 2390 |
| 1. Day CP; James OF | 1998 | U.K.  (England) | Steatohepatitis: a tale of two "hits"? | 2319 |
| 21. Bedossa P; Poynard T | 1996 | France | An algorithm for the grading of activity in chronic hepatitis C. The METAVIR Cooperative Study Group. | 2299 |
| 22. Hadziyannis SJ; Sette HJ | 2004 | Greece | Peginterferon-alpha2a and ribavirin combination therapy in chronic hepatitis C: a randomized study of treatment duration and ribavirin dose. | 2258 |
| 23. Desmet VJ; Gerber M | 1994 | Belgium | Classification of chronic hepatitis: diagnosis, grading and staging. | 2166 |
| 24.Beasley RP; Hwang LY | 1981 | China | Hepatocellular carcinoma and hepatitis B virus. A prospective study of 22 707 men in Taiwan. | 2164 |
| 25.Edmondson HA; Steiner PE | 1954 | United States | Primary carcinoma of the liver: a study of 100 cases among 48,900 necropsies. | 2163 |
| 26.Cheng AL; Kang YK | 2009 | China | Efficacy and safety of sorafenib in patients in the Asia-Pacific region with advanced hepatocellular carcinoma: a phase III randomised, double-blind, placebo-controlled trial. | 2163 |
| 27. Poynard T; Bedoss, P | 1997 | France | Natural history of liver fibrosis progression in patients with chronic hepatitis C. The OBSVIRC, METAVIR, CLINIVIR, and DOSVIRC groups. | 2155 |
| 28. Lohmann V; Korner F | 1999 | Germany | Replication of subgenomic hepatitis C virus RNAs in a hepatoma cell line. | 2134 |
| 29. El-Serag HB; Mason AC | 1999 | United States | Rising incidence of hepatocellular carcinoma in the United States. | 2110 |
| 30.Ghany MG; Strader DB | 2009 | United States | Diagnosis, Management, and Treatment of Hepatitis C: An Update. | 2062 |
| 31.Brunt EM; Janney CG | 1999 | United States | Nonalcoholic steatohepatitis: a proposal for grading and staging the histological lesions. | 2033 |
| 32. Wakita T; Pietschmann T | 2005 | Japan | Production of infectious hepatitis C virus in tissue culture from a cloned viral genome. | 2013 |
| 33.Alter MJ; Kruszon-Moran D | 1999 | United States | The prevalence of hepatitis C virus infection in the United States, 1988 through 1994. | 1983 |
| 34.Poynard T; Marcellin P | 1998 | France | Randomised trial of interferon alpha2b plus ribavirin for 48 weeks or for 24 weeks versus interferon alpha2b plus placebo for 48 weeks for treatment of chronic infection with hepatitis C virus. International Hepatitis Interventional Therapy Group (IHIT). | 1976 |
| 35. Lauer GM; Walker BD | 2001 | United States | Medical progress: Hepatitis C virus infection. | 1943 |
| 36.Matteon CA; Younossi ZM | 1999 | United States | Nonalcoholic fatty liver disease: a spectrum of clinical and pathological severity. | 1866 |
| 37.Browning JD; Szczepaniak LS | 2004 | United States | Prevalence of hepatic steatosis in an urban population in the United States: impact of ethnicity. | 1865 |
| 38. Llovet JM; Real MI | 2002 | Spain | Arterial embolisation or chemoembolisation versus symptomatic treatment in patients with unresectable hepatocellular carcinoma: a randomised controlled trial. | 1863 |
| 39. Knowles BB; Howe CC | 1980 | United States | Human hepatocellular carcinoma cell lines secrete the major plasma proteins and hepatitis B surface antigen. | 1803 |
| 1. Shepard CW; Finelli L | 2005 | United States | Global epidemiology of hepatitis C virus infection. | 1787 |
| 41. Lee, W M | 1997 | United States | Medical progress - Hepatitis B virus infection. | 1780 |
| 42. Chen CJ; Yang HI | 2006 | China | Risk of hepatocellular carcinoma across a biological gradient of serum hepatitis B virus DNA level. | 1764 |
| 43. Poordad F; McCone JJr | 2011 | United States | Boceprevir for Untreated Chronic HCV Genotype 1 Infection. | 1763 |
| 44. Llovet JM; Lencioni R | 2012 | Switzerland | EASL-EORTC Clinical Practice Guidelines: Management of hepatocellular carcinoma. | 1739 |
| 45. Lok ASF; McMahon BJ | 2007 | United States | Chronic hepatitis B. | 1733 |
| 46. Forner A; Llovet, JM | 2012 | Spain | Hepatocellular carcinoma. | 1728 |
| 47. Lok ASF; McMahon BJ | 2009 | United States | Chronic Hepatitis B: Update 2009. | 1717 |
| 48. Jacobson IM.; McHutchison JG | 2011 | United States | Telaprevir for Previously Untreated Chronic Hepatitis C Virus Infection. | 1717 |
| 49. Wai CT; Greenson JK | 2003 | United States | A simple noninvasive index can predict both significant fibrosis and cirrhosis in patients with chronic hepatitis C. | 1715 |
| 50. Llovet JM; Bruix J | 2003 | Spain | Systematic review of randomized trials for unresectable hepatocellular carcinoma: Chemoembolization improves survival. | 1706 |
| 51. Meng F; Henson R | 2007 | United States | MicroRNA-21 regulates expression of the PTEN tumor suppressor gene in human hepatocellular cancer. | 1696 |
| 52. Lindenbach BD; Evans MJ | 2005 | United States | Complete replication of hepatitis C virus in cell culture. | 1638 |
| 53. Tanaka Y; Nishida N | 2009 | Japan | Genome-wide association of IL28B with response to pegylated interferon-alpha and ribavirin therapy for chronic hepatitis C. | 1602 |
| 54. Llovet JM; Bru C | 1999 | Spain | Prognosis of hepatocellular carcinoma: the BCLC staging classification. | 1598 |
| 55. Davis GL; Balart LA | 1989 | United States | Treatment of chronic hepatitis C with recombinant interferon alfa. A multicenter randomized, controlled trial. | 1583 |
| 56. El-Serag HB | 2011 | United States | Hepatocellular Carcinoma. | 1570 |
| 1. Choo QL; Richman KH | 1991 | United States | Genetic organization and diversity of the hepatitis C virus. | 1566 |
| 58. Jopling CL; Yi M | 2005 | United States | Modulation of hepatitis C virus RNA abundance by a liver-specific MicroRNA. | 1563 |
| 59. Friedman SL | 2000 | United States | Molecular regulation of hepatic fibrosis, an integrated cellular response to tissue injury. | 1558 |
| 60. Lai CL; Chien RN | 1998 | China | A one-year trial of lamivudine for chronic hepatitis B. Asia Hepatitis Lamivudine Study Group. | 1545 |
| 61. Lavanchy D | 2004 | Switzerland | Hepatitis B virus epidemiology, disease burden, treatment, and current and emerging prevention and control measures. | 1536 |
| 62. Alter HJ; Purcell RH | 1989 | United States | Detection of antibody to hepatitis C virus in prospectively followed transfusion recipients with acute and chronic non-A, non-B hepatitis. | 1520 |
| 63. Marchesini G; Bugianesi E | 2003 | Italy | Nonalcoholic fatty liver, steatohepatitis, and the metabolic syndrome. | 1508 |
| 64. Neumann AU; Lam NP | 1998 | United States | Hepatitis C viral dynamics in vivo and the antiviral efficacy of interferon-alpha therapy. | 1506 |
| 65. Liaw YF; Sung JJY | 2004 | China | Lamivudine for patients with chronic hepatitis B and advanced liver disease. | 1493 |
| 66. Ganem D; Prince AM | 2004 | United States | Mechanisms of disease: Hepatitis B virus infection - Natural history and clinical consequences. | 1488 |
| 67. Pileri P; Uematsu Y | 1998 | Italy | Binding of hepatitis C virus to CD81. | 1487 |
| 68. Alter MJ; Margolis HS | 1992 | United States | The natural history of community-acquired hepatitis C in the United States. The Sentinel Counties Chronic non-A, non-B Hepatitis Study Team. | 1480 |
| 69. Okuda K; Ohtsuki T | 1985 | Japan | Natural history of hepatocellular carcinoma and prognosis in relation to treatment. Study of 850 patients. | 1465 |
| 70. Friedman SL | 2008 | United States | Mechanisms of hepatic fibrogenesis. | 1435 |
| 71. Bosch FX; Ribes J | 2004 | Spain | Primary liver cancer: worldwide incidence and trends. | 1433 |
| 72. Ludwig J; Viggiano TR | 1980 | United States | Nonalcoholic steatohepatitis: Mayo Clinic experiences with a hitherto unnamed disease. | 1415 |
| 73. Hsu IC; Metcalf RA | 1991 | United States | Mutational hotspot in the p53 gene in human hepatocellular carcinomas. | 1414 |
| 74. Suppiah V; Moldovan M | 2009 | Australia | IL28B is associated with response to chronic hepatitis C interferon-alpha and ribavirin therapy. | 1392 |
| 1. Thomas DL; Thio CL | 2009 | United States | Genetic variation in IL28B and spontaneous clearance of hepatitis C virus. | 1392 |
| 76. Marchesini G; Brizi M | 2001 | Italy | Nonalcoholic fatty liver disease: a feature of the metabolic syndrome. | 1378 |
| 77. Castera L; Vergniol J | 2005 | France | Prospective comparison of transient elastography, Fibrotest, APRI, and liver biopsy for the assessment of  fibrosis in chronic hepatitis C. | 1376 |
| 1. Friedman SL | 1993 | United States | Seminars in medicine of the Beth Israel Hospital, Boston. The cellular basis of hepatic fibrosis. Mechanisms and treatment strategies. | 1370 |
| 79. Sandrin L; Fourquet B | 2003 | France | Transient elastography: a new noninvasive method for assessment of hepatic fibrosis. | 1337 |
| 80. Adams LA; Lymp JF | 2005 | United States | The natural history of nonalcoholic fatty liver disease: a population-based cohort study. | 1335 |
| 1. Linnen, J; Wages JJ | 1996 | America United States | Molecular cloning and disease association of hepatitis G virus: a transfusion-transmissible agent. | 1333 |
| 82. Chisari FV; Ferrari C | 1995 | Italy | Hepatitis B virus immunopathogenesis. | 1333 |
| 83. Bedossa P; Dargere D | 2003 | France | Sampling variability of liver fibrosis in chronic hepatitis C. | 1318 |
| 84. Strader DB; Wright T | 2004 | United States | Diagnosis, management, and treatment of hepatitis C. | 1304 |
| 85. Zhong J; Gastaminza P | 2005 | United States | Robust hepatitis C virus infection in vitro. | 1302 |
| 1. Armstrong, GL; Wasley A | 2006 | United States | The prevalence of hepatitis C virus infection in the United States, 1999 through 2002. | 1289 |
| 87. Okamoto H; Sugiyama Y | 1992 | Japan | Typing hepatitis C virus by polymerase chain reaction with type-specific primers: application to clinical surveys and tracing infectious sources. | 1266 |
| 88. O'Grady, JG; Alexander GJ | 1989 | U.K.  (England) | Early indicators of prognosis in fulminant hepatic failure. | 1263 |
| 1. Neuschwander-Tetri BA;   Caldwell SH | 2003 | United States | Nonalcoholic steatohepatitis: summary of an AASLD Single Topic Conference. | 1236 |
| 90. Simmonds P; Holmes EC | 1993 | U.K.  (Scotland) | Classification of hepatitis C virus into six major genotypes and a series of subtypes by phylogenetic analysis of the NS-5 region. | 1229 |
| 91. Lo CM; Ngan H | 2002 | China | Randomized controlled trial of transarterial lipiodol chemoembolization for unresectable hepatocellular carcinoma. | 1210 |
| 92. Bressac B; Kew M | 1991 | United States | Selective G to T mutations of p53 gene in hepatocellular carcinoma from southern Africa. | 1204 |
| 93. Farrell GC; Larter CZ | 2006 | Australia | Nonalcoholic fatty liver disease: from steatosis to cirrhosis. | 1187 |
| 94. Perz JF; Armstrong GL | 2006 | United States | The contributions of hepatitis B virus and hepatitis C virus infections to cirrhosis and primary liver cancer worldwide. | 1179 |
| 95. Yao FY; Ferrell L | 2001 | United States | Liver transplantation for hepatocellular carcinoma: expansion of the tumor size limits does not adversely impact survival. | 1176 |
| 96. Wiesner R; Edwards E | 2003 | United States | Model for end-stage liver disease (MELD) and allocation of donor livers. | 1170 |
| 97. Browning JD; Horton JD | 2004 | United States | Molecular mediators of hepatic steatosis and liver injury. | 1170 |
| 98. Donnelly, KL; Smith, CI | 2005 | United States | Sources of fatty acids stored in liver and secreted via lipoproteins in patients with nonalcoholic fatty liver disease. | 1170 |
| 99. Papatheodoridis G; Buti M | 2012 | Switzerland | EASL Clinical Practice Guidelines: Management of chronic hepatitis B virus infection. | 1164 |
| 100. Sanyal AJ; Campbell-Sargent C | 2001 | United States | Nonalcoholic steatohepatitis: association of insulin resistance and mitochondrial abnormalities. | 1155 |
