# Supplementary material
Source: Elsevier journal article supplement (https://www.sciencedirect.com/science/article/pii/S0210570520300704)
Supplement: mmc2 [file S0210570520300704:mmc2.doc]

**Table S2 Fields of study based on decade of publication.**

| Field of  Study | 1950-1960 | 1961-1970 | 1971-1980 | 1981-1990 | 1991-2000 | 2001-  2010 | 2011-2017 | Total |
| --- | --- | --- | --- | --- | --- | --- | --- | --- |
| Hepatits | — | — | — | 4 | 12 | 14 | 2 | 32 |
| Hepatocellular  carcinoma | 1 | — | — | 1 | 4 | 8 | — | 14 |
| Nonalcoholic fatty liver disease | — | — | — | — | 2 | 5 | — | 7 |
| Hepatitis, cirrhosis and hepatocellular carcinoma | — | — | 1 | 1 | 1 | 2 | — | 5 |
| Others | — | — | — | 1 | — | 1 | — | 2 |
| Total | 1 | — | 1 | 7 | 19 | 30 | 2 | 60 |
