# Supplementary material
Source: Elsevier journal article supplement (https://www.sciencedirect.com/science/article/pii/S0210570520300704)
Supplement: mmc3 [file S0210570520300704:mmc3.doc]

**Table S3 Subspecialties of hepatitis based on virus subtypes.**

|  | No.(%) | Related to cirrhosis.  No. (%) | Related to liver cancer.  No. (%) |
| --- | --- | --- | --- |
| HAV | — | — | — |
| HBV | 5 (13.5) | — | 3 (8.1) |
| HCV | 28 (75.7) | 2 (5.4) | — |
|  |  |  | |
| Others | 4 (10.8) | — | — |
| Total | 37 (100) | 2 (5.4) | 3 (8.1) |
